# Supplementary material for: Stronger Association between Insomnia Symptoms and Shorter Telomere Length in Old HIV-Infected Patients Compared with Uninfected Individuals
Source: PubMed Central journal article supplement (PMC6284770; doi:10.14336/ad.2018.0204), 2018-12-04
Supplement: AD-9-6-1010-s.pdf [file AD-9-6-1010-s.pdf]

## **Stronger Association between Insomnia Symptoms and Shorter Telomere Length in Old HIV-Infected Patients Compared with Uninfected Individuals**

**Yingying Ding<sup>1,2</sup>, Haijiang Lin<sup>3</sup>, Sujuan Zhou<sup>1,2</sup>, Keran Wang<sup>1,2</sup>, Lingling Li<sup>1,2</sup>, Yucheng Zhang<sup>1,2</sup>, Yuan Yao<sup>1,2</sup>, Meiyang Gao<sup>1,2</sup>, Xing Liu<sup>1,2</sup>, Na He<sup>1,2, \*</sup>**

<sup>1</sup> Department of Epidemiology, School of Public Health, Fudan University, Shanghai, China

<sup>2</sup> The Key Laboratory of Public Health Safety of Ministry of Education, Fudan University, Shanghai, China

<sup>3</sup> Taizhou City Center for Disease Control and Prevention, Taizhou City, Zhejiang Province, China

# SUPPLEMENTARY DATA

**Supplementary Table 1.** Univariable and multivariable Logistic regression analyses of possible correlates of insomnia symptoms in HIV-infected and HIV-uninfected participants.

|                                             | HIV-infected participants |                 |                           |                 | HIV-uninfected participants |                 |                           |              |
|---------------------------------------------|---------------------------|-----------------|---------------------------|-----------------|-----------------------------|-----------------|---------------------------|--------------|
|                                             | cOR (95% CI)              | <i>P</i>        | aOR (95% CI) <sup>a</sup> | <i>P</i>        | cOR (95% CI)                | <i>P</i>        | aOR (95% CI) <sup>a</sup> | <i>P</i>     |
| Age, years                                  |                           |                 |                           |                 |                             |                 |                           |              |
| 40-54                                       | 1.00                      |                 |                           |                 | 1.00                        |                 |                           |              |
| 55-82                                       | 1.20 (0.62–2.33)          | 0.585           |                           |                 | 1.75 (0.74–4.15)            | 0.205           |                           |              |
| Age as a continuous variable                | 0.99 (0.96–1.03)          | 0.682           | 0.99 (0.96–1.04)          | 0.880           | <b>1.05 (1.01–1.10)</b>     | <b>0.014</b>    | 1.04 (0.99–1.09)          | 0.057        |
| Male                                        | 0.68 (0.34–1.36)          | 0.276           |                           |                 | 0.51 (0.21–1.26)            | 0.145           | 0.44 (0.17–1.14)          | 0.092        |
| Junior Middle school or above               | 0.62 (0.33–1.19)          | 0.150           |                           |                 | 0.72 (0.30–1.71)            | 0.458           |                           |              |
| BMI, kg/m <sup>2</sup>                      | 0.93 (0.84–1.03)          | 0.188           |                           |                 | 0.91 (0.81–1.02)            | 0.118           |                           |              |
| WHR above the cutoff <sup>b</sup>           | 0.51 (0.27–0.98)          | 0.043           |                           |                 | 1.15 (0.49–2.70)            | 0.745           |                           |              |
| Smoking status                              |                           |                 |                           |                 |                             |                 |                           |              |
| Previous smoker (vs never)                  | 0.27 (0.06–1.21)          | 0.087           |                           |                 | 1.22 (0.25–5.95)            | 0.802           |                           |              |
| Current smoker (vs never)                   | 0.84 (0.41–1.73)          | 0.633           |                           |                 | 0.69 (0.27–1.78)            | 0.442           |                           |              |
| Current alcohol user <sup>c</sup>           | 1.25 (0.39–4.00)          | 0.704           |                           |                 |                             |                 |                           |              |
| Depressive symptoms as continuous variable  | <b>1.28 (1.18–1.40)</b>   | <b>&lt;.001</b> | <b>1.28 (1.18–1.40)</b>   | <b>&lt;.001</b> | <b>1.20 (1.08–1.32)</b>     | <b>&lt;.001</b> | <b>1.19 (1.07–1.32)</b>   | <b>0.001</b> |
| <i>HIV-related characteristics</i>          |                           |                 |                           |                 |                             |                 |                           |              |
| Homosexual HIV transmission                 | 1.09 (0.47–2.53)          | 0.838           |                           |                 |                             |                 |                           |              |
| Years since HIV diagnosis                   | 0.87 (0.74–1.01)          | 0.062           |                           |                 |                             |                 |                           |              |
| Nadir CD4 count (cells/μL)                  |                           |                 |                           |                 |                             |                 |                           |              |
| 100–199 (vs <100)                           | 1.40 (0.60–3.26)          | 0.440           |                           |                 |                             |                 |                           |              |
| ≥ 200 (vs < 100)                            | 1.06 (0.45–2.50)          | 0.890           |                           |                 |                             |                 |                           |              |
| Current CD4 count ≥ 200 cells/μL            | 0.73 (0.32–1.68)          | 0.463           |                           |                 |                             |                 |                           |              |
| Using cART at enrollment                    |                           |                 |                           |                 |                             |                 |                           |              |
| cART naïve                                  | 0.79 (0.25–2.53)          | 0.690           |                           |                 |                             |                 |                           |              |
| on cART < 3 years                           | 1.00                      |                 |                           |                 |                             |                 |                           |              |
| on cART ≥ 3 years                           | 0.39 (0.18–0.84)          | 0.016           |                           |                 |                             |                 |                           |              |
| Using EFV at enrollment                     | 0.86 (0.45–1.63)          | 0.640           |                           |                 |                             |                 |                           |              |
| Plasma HIV RNA < 200 copies/mL <sup>d</sup> | 1.25 (0.26–5.94)          | 0.779           |                           |                 |                             |                 |                           |              |

<sup>a</sup>Variables with  $P < 0.15$  in univariate analysis were used in the development of a multivariate model with enforced entry of age. Backward selection was used with retention at  $P < 0.10$ .

<sup>b</sup>Values of  $\geq 0.9$  for men and  $\geq 0.85$  for women define abdominal obesity.

<sup>c</sup>None of HIV-uninfected participants with insomnia symptoms were current alcohol user (0/23).

<sup>d</sup>Data are available for 175 HIV-infected participants.

aOR, adjusted odds ratio; BMI, body mass index; cART, combination antiretroviral therapy; CI, confidence interval; cOR, crude odds ratio; WHR, waist to hip circumference ratio.

# SUPPLEMENTARY DATA

**Supplementary Table 2.** Sample characteristics of HIV-infected participants by HIV RNA level.

|                                                 | HIV RNA < 200<br>copies/mL | HIV RNA ≥ 200<br>copies/mL | With no available HIV<br>RNA data close to<br>survey | <i>P</i> <sup>a</sup> |
|-------------------------------------------------|----------------------------|----------------------------|------------------------------------------------------|-----------------------|
| <i>Subjects</i>                                 | 158                        | 17                         | 69                                                   |                       |
| Age, years                                      | 52.1±9.0                   | 55.2±10.7                  | 52.1±9.0                                             | 0.548                 |
| 40-54                                           | 102 (64.6)                 | 8 (47.1)                   | 47 (68.1)                                            |                       |
| 55-82                                           | 56 (35.4)                  | 9 (52.9)                   | 22 (31.9)                                            |                       |
| Male                                            | 113 (71.5)                 | 13 (76.5)                  | 54 (78.3)                                            | 0.550                 |
| Junior middle school or above                   | 95 (60.1)                  | 10 (58.8)                  | 40 (58.0)                                            | 0.954                 |
| BMI, kg/m <sup>2</sup>                          | 21.8 (20.3–23.8)           | 22.6 (20.0–24.0)           | 22.3 (20.7–24.1)                                     | 0.565                 |
| Waist circumference, cm                         | 80.0 (75.0–86.0)           | 85.0 (78.0–87.0)           | 82.0 (78.0–88.0)                                     | 0.190                 |
| Hip circumference, cm                           | 90.0 (85.0–95.0)           | 96.0 (84.0–97.8)           | 90.0 (85.0–96.0)                                     | 0.594                 |
| WHR above the cutoff <sup>b</sup>               | 98 (62.0)                  | 9 (52.9)                   | 47 (68.1)                                            | 0.303                 |
| Smoking status                                  |                            |                            |                                                      | 0.953                 |
| Current smoker                                  | 94 (59.5)                  | 9 (52.9)                   | 42 (60.9)                                            |                       |
| Previous smoker                                 | 18 (11.4)                  | 2 (11.8)                   | 9 (13.0)                                             |                       |
| Never smoker                                    | 46 (29.1)                  | 6 (35.3)                   | 18 (26.1)                                            |                       |
| Current alcohol user                            | 10 (6.3)                   | 1 (5.9)                    | 7 (10.1)                                             | 0.582                 |
| Depressive symptoms as a continuous<br>variable | 16.1±4.9                   | 16.9±5.0                   | 17.5±4.7                                             | 0.137                 |
| Insomnia symptoms                               | 28 (17.7)                  | 4 (23.5)                   | 14 (20.3)                                            | 0.792                 |
| Insomnia symptoms as a continuous<br>variable   | 6.4±2.6                    | 7.1±3.0                    | 6.7±2.8                                              | 0.608                 |
| <i>HIV-related parameters</i>                   |                            |                            |                                                      |                       |
| Homosexual HIV transmission                     | 28 (17.7)                  | 3 (17.7)                   | 14 (20.3)                                            | 0.504                 |
| Years since HIV diagnosis                       | 3.6 (2.0–5.3)              | 4.1 (2.1–6.6)              | 1.2 (0.6–3.0)                                        | <.001                 |
| Nadir CD4 count, cells/μL                       |                            |                            |                                                      | <.001                 |
| <100                                            | 46 (29.1)                  | 4 (29.4)                   | 9 (13.0)                                             |                       |
| 100–199                                         | 65 (41.1)                  | 5 (41.2)                   | 15 (21.7)                                            |                       |
| ≥ 200                                           | 47 (29.8)                  | 5 (29.4)                   | 45(65.2)                                             |                       |
| Current CD4 count ≥ 200 cells/μL                | 135 (85.4)                 | 13 (76.5)                  | 57 (82.6)                                            | 0.588                 |
| Using cART at enrollment                        |                            |                            |                                                      | <.001                 |
| cART naive                                      | 0 (0.0)                    | 0 (0.0)                    | 20 (29.0)                                            |                       |
| On cART < 3 years                               | 79 (50.0)                  | 8 (47.1)                   | 46 (66.7)                                            |                       |
| On cART ≥ 3 years                               | 79 (50.0)                  | 9 (52.9)                   | 3 (4.3)                                              |                       |
| Duration on cART, years <sup>c</sup>            | 3.0 (1.8–3.8)              | 3.0 (2.1–4.0)              | 0.3 (0.2–0.6)                                        | <.001                 |
| Using EFV at enrollment                         | 78 (49.4)                  | 8 (47.1)                   | 33 (47.8)                                            | 0.967                 |
| Leukocyte telomere length (LTL)                 | 0.9±0.4                    | 0.8±0.3                    | 1.0±0.5                                              | 0.026                 |
| Geometric mean LTL <sup>e</sup>                 | 0.80 (0.74–0.86)           | 0.72 (0.58–0.89)           | 0.90 (0.80–1.02)                                     | 0.075                 |

Data are no. (%), mean±SD or median (interquartile range [IQR]), unless otherwise indicated.

<sup>a</sup>By the  $\chi^2$ , Fisher's exact test or Anova, Kruskal-Wallis, as appropriate.

<sup>b</sup>Values of ≥0.9 for men and ≥0.85 for women define abdominal obesity.

<sup>c</sup>Data are available for 224 HIV-infected cART recipients.

<sup>d</sup>Data are available for 175 HIV-infected participants.

<sup>e</sup>Refers to geometric mean and 95% confidence interval.

BMI, body mass index; cART, combination antiretroviral therapy; WHR, waist to hip circumference ratio.

# SUPPLEMENTARY DATA

**Supplementary Table 3.** Univariable analyses of the association between various factors and leukocyte telomere length in all participants and separated by HIV serostatus and age group.

|                                              | All participants                       |                                         | Age 40-54 y                            |                                         | Age 55-82 y                             |                                           |
|----------------------------------------------|----------------------------------------|-----------------------------------------|----------------------------------------|-----------------------------------------|-----------------------------------------|-------------------------------------------|
|                                              | HIV+                                   | HIV-                                    | HIV+                                   | HIV-                                    | HIV+                                    | HIV-                                      |
|                                              | Percentage change (95% CI)             | Percentage change (95% CI)              | Percentage change (95% CI)             | Percentage change (95% CI)              | Percentage change (95% CI)              | Percentage change (95% CI)                |
| Age as a continuous variable                 | -0.4 (-1.0 to 0.3)                     | <b>-0.5 (-1.0 to 0.1)<sup>†</sup></b>   | -0.6 (-2.6 to 1.4)                     | <b>-1.6 (-3.3 to 0.1)<sup>†</sup></b>   | -0.8 (-2.5 to 0.8)                      | <b>-1.0 (-2.4 to 0.3)<sup>‡</sup></b>     |
| Male                                         | -2.2 (-14.4 to 11.7)                   | <b>-9.2 (-19.0 to 1.8)<sup>†</sup></b>  | -9.6 (-23.5 to 6.9)                    | -7.5 (-19.8 to 6.7)                     | 10.7 (-11.0 to 37.7)                    | -12.3 (-27.5 to 6.1)                      |
| Junior middle school or above                | 6.1 (-5.8 to 19.4)                     | <b>-9.8 (-18.6 to -0.2)<sup>†</sup></b> | 4.3 (-11.5 to 22.9)                    | -5.0 (-17.4 to 9.2)                     | 7.1 (-13.0 to 31.9)                     | <b>-23.8 (-36.0 to -9.2)<sup>**</sup></b> |
| BMI, kg/m <sup>2</sup>                       | -0.6 (-2.3 to 1.2)                     | -0.1 (1.5 to 1.3)                       | -1.2 (-3.2 to 0.8)                     | 0.1 (-1.6 to 1.8)                       | 1.3 (-2.4 to 5.2)                       | -0.8 (-3.3 to 1.8)                        |
| WHR above the cutoff <sup>‡</sup>            | -1.7 (-12.9 to 10.9)                   | -4.4 (-13.6 to 5.8)                     | -0.4 (-14.2 to 15.6)                   | 3.2 (-8.9 to 16.8)                      | -3.7 (-21.9 to 18.9)                    | <b>-16.7 (-30.5 to -0.2)<sup>†</sup></b>  |
| Smoking status                               |                                        |                                         |                                        |                                         |                                         |                                           |
| Previous smoker (vs never)                   | -6.2 (-22.1 to 12.9)                   | -4.6 (-22.6 to 17.4)                    | -15.1 (-34.5 to 10.2)                  | -12.1 (-35.1 to 18.9)                   | 6.1 (-19.2 to 39.3)                     | 6.3 (-21.3 to 43.6)                       |
| Current smoker (vs never)                    | -0.1 (-85.7 to 596.1)                  | -6.4 (-15.8 to 4.1)                     | -4.2 (-18.4 to 12.4)                   | <b>-10.5 (-21.4 to 1.8)<sup>†</sup></b> | 8.4 (-14.8 to 37.9)                     | 2.5 (-14.9 to 23.5)                       |
| Current alcohol user                         | 11.5 (-10.8 to 39.3)                   | 5.7 (-12.0 to 27.0)                     | 0.3 (-24.5 to 33.3)                    | 1.5 (-22.2 to 32.6)                     | <b>32.3 (-7.7 to 89.5)<sup>‡</sup></b>  | 11.4 (-14.2 to 44.7)                      |
| Depressive symptoms as a continuous variable | -0.5 (-1.7 to 0.7)                     | -2.5 (-3.8 to -1.2) <sup>***</sup>      | 0.5 (-1.0 to 2.0)                      | <b>-2.3 (-3.9 to -0.6)<sup>**</sup></b> | <b>-2.4 (-4.4 to -0.4)<sup>*</sup></b>  | <b>-2.8 (-5.1 to -0.6)<sup>*</sup></b>    |
| Insomnia symptoms                            | -5.3 (-18.4 to 10.0)                   | -8.1 (-22.7 to 9.1)                     | 6.8 (-11.7 to 29.0)                    | 2.0 (-19.2 to 28.9)                     | -21.6 (-38.3 to -0.3) <sup>*</sup>      | -17.8 (-36.6 to 6.5)                      |
| Insomnia symptoms as a continuous variable   | <b>-1.9 (-4.0 to 0.2)<sup>†</sup></b>  | <b>-2.9 (-5.1 to -0.7)<sup>*</sup></b>  | 0.4 (-2.3 to 3.2)                      | <b>-2.4 (-5.5 to 0.8)<sup>‡</sup></b>   | <b>-5.3 (-8.4 to -2.2)<sup>**</sup></b> | <b>-3.2 (-6.5 to 0.1)<sup>†</sup></b>     |
| <i>HIV-related variables</i>                 |                                        |                                         |                                        |                                         |                                         |                                           |
| Homosexual HIV transmission                  | 5.0 (-9.6 to 22.1)                     |                                         | 4.9 (-11.7 to 24.7)                    |                                         | 2.5 (-26.0 to 42.0)                     |                                           |
| Years since HIV diagnosis                    | 1.2 (-1.2 to 3.7)                      |                                         | 0.5 (-2.5 to 3.5)                      |                                         | 2.7 (-1.4 to 7.0)                       |                                           |
| Nadir CD4 count (cells/μL)                   |                                        |                                         |                                        |                                         |                                         |                                           |
| 100–199 (vs < 100)                           | 9.7 (-5.9 to 27.8)                     |                                         | <b>14.8 (-4.6 to 38.2)<sup>‡</sup></b> |                                         | 1.0 (-23.5 to 33.3)                     |                                           |
| ≥ 200 (vs < 100)                             | 6.6 (-8.2 to 23.8)                     |                                         | 9.1 (-9.0 to 30.8)                     |                                         | 1.8 (-22.5 to 33.7)                     |                                           |
| Current CD4 count ≥ 200 cells/μL             | <b>14.4 (-2.3 to 34.1)<sup>†</sup></b> |                                         | <b>17.6 (-3.4 to 43.2)<sup>‡</sup></b> |                                         | 8.9 (-16.8 to 42.5)                     |                                           |
| Using cART at enrollment                     |                                        |                                         |                                        |                                         |                                         |                                           |
| cART naïve vs on ART < 3 years               | 13.2 (-9.0 to 40.9)                    |                                         | <b>25.1 (-2.2 to 60.2)<sup>†</sup></b> |                                         | -24.6 (-53.3 to 21.7)                   |                                           |
| on cART ≥ 3 vs < 3 years                     | 2.3 (-9.6 to 15.8)                     |                                         | 1.7 (-12.8 to 18.6)                    |                                         | 3.4 (-16.0 to 27.3)                     |                                           |
| Using EFV at enrollment                      | -0.03 (-12.6 to 14.3)                  |                                         | 2.2 (-13.6 to 21.0)                    |                                         | -3.5 (-22.8 to 20.7)                    |                                           |
| Plasma HIV RNA < 200 copies/mL <sup>b</sup>  | 11.3 (-10.2 to 39.4)                   |                                         | -4.9 (-36.5 to 42.5)                   |                                         | <b>33.8 (-2.4 to 83.5)<sup>†</sup></b>  |                                           |

<sup>‡</sup>  $P < 0.15$ , <sup>†</sup>  $P < 0.1$ , \*  $P < 0.05$ , \*\*  $P < 0.01$ , \*\*\*  $P < 0.001$ .

<sup>a</sup> Values of  $\geq 0.9$  for men and  $\geq 0.85$  for women define abdominal obesity.

<sup>b</sup> Data are available for 175 HIV-infected participants.

BMI, body mass index; cART, combination antiretroviral therapy; CI, confidence interval; WHR, waist to hip circumference ratio.
